# Supplementary material for: Barriers and strategies to successful tuberculosis treatment in a high-burden tuberculosis setting: a qualitative study from the patient’s perspective
Source: Springer Nature journal article supplement (doi:10.1186/s12889-021-12005-y), 2021-10-21
Supplement: MOESM4 [file 19781048]

**Additional file 4.** Codes' pattern among the study participants

| No | Codes                                                              | CHC's Physician | CHC' Pharmacist | CHC's TB Programmer / nurse | Community pharmacist | Hospital pharmacist | Hospital's nurse | Local government key persons | TB patients | TB specialist | TB Activist | Totals |
|----|--------------------------------------------------------------------|-----------------|-----------------|-----------------------------|----------------------|---------------------|------------------|------------------------------|-------------|---------------|-------------|--------|
| 1  | Socio, demography, economic                                        |                 |                 |                             |                      |                     |                  |                              |             |               |             |        |
|    | Stigmatization                                                     | 4               | 2               | 4                           | 0                    | 0                   | 0                | 0                            | 3           | 0             | 3           | 16     |
|    | Family support                                                     | 0               | 0               | 1                           | 0                    | 0                   | 0                | 1                            | 1           | 0             | 2           | 5      |
|    | Distance                                                           | 0               | 0               | 0                           | 0                    | 0                   | 0                | 0                            | 5           | 0             | 0           | 5      |
|    | Difficulties in public transportation                              | 0               | 0               | 1                           | 1                    | 0                   | 0                | 1                            | 0           | 0             | 0           | 3      |
|    | Additional cost in the public services                             | 1               | 0               | 0                           | 0                    | 0                   | 0                | 0                            | 1           | 1             | 0           | 3      |
|    | Cost for diagnosis and treatment in the private clinic or hospital | 3               | 1               | 3                           | 5                    | 0                   | 0                | 2                            | 8           | 0             | 0           | 22     |
|    | Household income problem                                           | 0               | 0               | 2                           | 0                    | 0                   | 0                | 0                            | 0           | 0             | 1           | 3      |
|    | Transportation cost                                                | 1               | 0               | 0                           | 0                    | 0                   | 0                | 1                            | 3           | 0             | 0           | 5      |
| 2  | Knowledge and perception                                           |                 |                 |                             |                      |                     |                  |                              |             |               |             |        |
|    | Lack of knowledge about TB disease                                 | 5               | 2               | 6                           | 2                    | 0                   | 0                | 0                            | 2           | 1             | 2           | 20     |
|    | Lack of knowledge about TB program                                 | 0               | 0               | 0                           | 1                    | 0                   | 0                | 0                            | 3           | 0             | 0           | 4      |

|              |                                                             |   |   |   |    |   |   |   |    |   |   |            |
|--------------|-------------------------------------------------------------|---|---|---|----|---|---|---|----|---|---|------------|
|              | Lack of knowledge about TB treatment                        | 2 | 3 | 3 | 12 | 0 | 0 | 3 | 8  | 1 | 0 | 32         |
|              | Patient perception of public health service                 | 1 | 0 | 0 | 1  | 0 | 0 | 1 | 0  | 0 | 0 | 3          |
|              | Patient perception of the physician or health care provider | 0 | 0 | 1 | 3  | 0 | 0 | 0 | 0  | 1 | 0 | 5          |
|              | Perception on self-condition                                | 2 | 0 | 2 | 2  | 0 | 0 | 0 | 3  | 1 | 4 | 14         |
| 3            | TB treatment                                                |   |   |   |    |   |   |   |    |   |   |            |
|              | Adverse drug reaction                                       | 5 | 4 | 8 | 0  | 0 | 1 | 2 | 16 | 3 | 3 | 42         |
|              | Long duration of treatment                                  | 0 | 0 | 1 | 0  | 0 | 1 | 0 | 0  | 0 | 0 | 2          |
| <b>Total</b> |                                                             |   |   |   |    |   |   |   |    |   |   | <b>184</b> |
